# Supplementary material for: Field evaluation of a passive personal air sampler for screening of PAH exposure in workplaces
Source: Royal Society of Chemistry journal article supplement (doi:10.1039/c0em00018c), 2010-01-01
Supplement: c0em00018c.pdf [file c0em00018c.pdf]

## ***Supporting Information to:***

# **Field evaluation of a passive personal air sampler for PAH exposure in workplaces**

Pernilla Bohlin<sup>1\*</sup>, Kevin C. Jones<sup>2</sup>, Jan-Olof Levin<sup>3</sup>, Roger Lindahl<sup>3</sup> and Bo Strandberg<sup>1</sup>

<sup>1</sup>Department of Occupational and Environmental Medicine, The Sahlgrenska Academy at University of Gothenburg, Gothenburg, Sweden

<sup>2</sup>Centre for Chemicals Management, Lancaster Environment Centre, Lancaster University, Lancaster, LA1 4YQ, UK

<sup>3</sup>Department of Chemistry, Umeå University, SE-901 87 Umeå, Sweden

## **Table of contents**

|                                                                                                                                                  |           |
|--------------------------------------------------------------------------------------------------------------------------------------------------|-----------|
| <b>Text SI-1:</b> Material and methods: QA/QC.....                                                                                               | <b>S2</b> |
| <b>Table SI-1:</b> Air concentrations of 15 EPA PAHs in $\mu\text{g m}^{-3}$ (sum of gas and particle phase), derived from active sampling.....  | <b>S3</b> |
| <b>Table SI-2:</b> Air concentrations of 16 extra PAHs in $\mu\text{g m}^{-3}$ (sum of gas and particle phase) derived from active sampling..... | <b>S4</b> |
| <b>Table SI-3:</b> Estimated sampling rates ( $\text{m}^3 \text{day}^{-1}$ ) for 16 extra PAHs.....                                              | <b>S5</b> |
| <b>Table SI-4:</b> Accuracy of R-values in estimating air concentrations.....                                                                    | <b>S6</b> |
| <b>Figure SI-1:</b> Schematic figure of sampling points.....                                                                                     | <b>S7</b> |
| <b>Figure SI-2:</b> PAH pattern in the two sites.....                                                                                            | <b>S8</b> |
| <b>Figure SI-3:</b> Spatial distribution of PAHs from mini-PUF and active samplers.....                                                          | <b>S9</b> |

## Text SI-1

### *Quality assurance/Quality control*

Field blanks (1 in 7 samples) were taken every deployment day by keeping pre-cleaned mini-PUFs, PUF-PAS disks, GFFs, PUF plugs, and XAD-2 outside in the deployment area during the assembly of the samplers. The field and lab blanks were extracted and analyzed parallel with and in the same way as the samples. The levels of all PAH compounds in the field blanks and lab blanks never exceeded 1% of the quantities detected in the samples, indicating minimal contamination during transport, deployment, and storage before analysis. The limit of detection (LOD), calculated as the mean field blanks plus three times the standard deviation of the mean, varied depending on compound from 0.1 to 5 ng per sample, except for naphthalene which had a LOD of 60 ng per sample.

Quality control samples spiked with certified reference materials (urban dust; SRM1649a, National Institute of Standards & Technology, Gaithersburg, MD) were extracted, cleaned and analyzed together with the samples. The levels did not deviate from the certified results for the PAH compounds.

**Table SI-1.** Air concentrations of 15 EPA PAHs in  $\mu\text{g m}^{-3}$  (gas and particle phase), from active sampling, at the two sampling points within each site, presented as average of the two one week samplings at site 1 and average of replicates at site 2, together with the percentage of each compound found in the gas phase (PUF plugs or XAD-2) (%GP).

| Concentration ( $\mu\text{g}/\text{m}^3$ ) | Site 1a <sup>a</sup> (n=2) |     | Site 1b <sup>a</sup> (n=2) |     | Site 2a (n=4) |     | Site 2b (n=2) |     |
|--------------------------------------------|----------------------------|-----|----------------------------|-----|---------------|-----|---------------|-----|
|                                            | Mean                       | %GP | Mean                       | %GP | Mean          | %GP | Mean          | %GP |
| <b>Nap</b>                                 | 0.065                      | 97  | 0.031                      | 97  | 6.1           | 99  | 6.2           | 99  |
| <b>Acy</b>                                 | 0.043                      | 99  | 0.023                      | 99  | 2.6           | 100 | 0.36          | 99  |
| <b>Ace</b>                                 | 0.26                       | 99  | 0.027                      | 98  | 0.93          | 98  | 0.10          | 90  |
| <b>Flu</b>                                 | 0.26                       | 99  | 0.046                      | 98  | 4.7           | 100 | 0.23          | 93  |
| <b>Phe</b>                                 | 0.45                       | 96  | 0.080                      | 94  | 7.3           | 98  | 0.57          | 80  |
| <b>Fla</b>                                 | 0.20                       | 73  | 0.051                      | 72  | 4.3           | 74  | 0.31          | 64  |
| <b>Pyr</b>                                 | 0.054                      | 74  | 0.026                      | 71  | 2.5           | 65  | 0.19          | 54  |
| <b>BaA</b>                                 | 0.006                      | 31  | 0.003                      | 36  | 2.1           | 3.0 | 0.12          | 15  |
| <b>Chr</b>                                 | 0.026                      | 16  | 0.016                      | 20  | 2.4           | 3.0 | 0.15          | 22  |
| <b>BbF</b>                                 | 0.008                      | 5.9 | 0.010                      | 13  | 1.1           | 2.0 | 0.078         | 6.0 |
| <b>BkF</b>                                 | 0.005                      | 8.9 | 0.004                      | 19  | 0.72          | 2.0 | 0.061         | 6.9 |
| <b>BaP</b>                                 | 0.005                      | 25  | 0.003                      | 32  | 2.3           | 1.0 | 0.16          | 6.4 |
| <b>Ind</b>                                 | 0.002                      | 5.5 | 0.003                      | 21  | 0.36          | 0.7 | 0.032         | 8.6 |
| <b>DaA</b>                                 | <0.001                     | 38  | <0.001                     | 22  | 0.075         | 0.3 | 0.007         | 0.0 |
| <b>BgP</b>                                 | 0.006                      | 17  | 0.004                      | 17  | 1.0           | 0.6 | 0.11          | 5.4 |
| <b>Sum<sub>15</sub>PAH</b>                 | 1.4                        |     | 0.31                       |     | 38            |     | 9.3           |     |

<sup>a</sup>Previously reported in Bohlin et al.<sup>25</sup>.

**Table SI-2.** Air concentrations of 16 extra PAHs in  $\mu\text{g m}^{-3}$  (gas and particle phase), from active sampling, at the two sampling points within each site, presented as average of the two one week samplings at site 1 and average of replicates at site 2, together with the percentage of each compound found in the gas phase (PUF plugs or XAD-2) (%GP).

| Concentration ( $\mu\text{g}/\text{m}^3$ ) | Site 1a (n=2) |     | Site 1b (n=2) |     | Site 2a (n=4) |     | Site 2b (n=2) |     |
|--------------------------------------------|---------------|-----|---------------|-----|---------------|-----|---------------|-----|
|                                            | Mean          | %GP | Mean          | %GP | Mean          | %GP | Mean          | %GP |
| <b>1-Methylnaphthalene</b>                 | 0.11          | 99  | 0.018         | 98  | 2.5           | 98  | 6.2           | 99  |
| <b>2-Methylnaphthalene</b>                 | 0.073         | 99  | 0.011         | 98  | 1.1           | 98  | 0.36          | 98  |
| <b>Biphenyl</b>                            | 0.055         | 99  | 0.011         | 98  | 0.36          | 97  | 0.10          | 96  |
| <b>2,3-Dimethylnaphthalene</b>             | 0.012         | 99  | 0.003         | 98  | 0.17          | 98  | 0.23          | 89  |
| <b>2,3,5-Trimethylnaphthalene</b>          | 0.003         | 98  | 0.002         | 97  | 0.15          | 93  | 0.57          | 73  |
| <b>1-Methylfluorene</b>                    | 0.002         | 98  | 0.001         | 94  | 0.21          | 97  | 0.10          | 75  |
| <b>2-Methylphenanthrene</b>                | 0.023         | 94  | 0.002         | 87  | 0.48          | 95  | 0.31          | 71  |
| <b>3-Methylphenanthrene</b>                | 0.026         | 92  | 0.003         | 84  | 0.58          | 95  | 0.19          | 68  |
| <b>1-Methylphenanthrene</b>                | 0.013         | 94  | 0.002         | 86  | 0.39          | 92  | 0.12          | 70  |
| <b>1-Methylanthracene</b>                  | 0.010         | 92  | 0.002         | 83  | 0.19          | 92  | 0.15          | 69  |
| <b>2-Phenylnaphthalene</b>                 | 0.011         | 83  | 0.002         | 76  | 0.23          | 90  | 0.078         | 63  |
| <b>1-Methylfluoranthene</b>                | 0.004         | 48  | 0.002         | 32  | 0.05          | 22  | 0.061         | 45  |
| <b>1-Methylpyrene</b>                      | <0.001        | 52  | <0.001        | 32  | 0.04          | 14  | 0.16          | 42  |
| <b>Retene</b>                              | <0.001        | 47  | <0.001        | 39  | 0.005         | 42  | 0.032         | 84  |
| <b>2-Methylchrysene</b>                    | <0.001        |     | <0.001        | 21  | 0.22          | 4   | 0.007         | 8   |
| <b>Perylene</b>                            | 0.001         | 1   | 0.001         | 71  | 0.57          | 1   | 0.11          | 20  |

**Table SI-3.** Estimated R-values ( $\text{m}^3 \text{day}^{-1}$ ), average $\pm$ standard deviation, for 16 extra PAHs.

| PUF:<br>Exposure time:            | <b>PUF-PAS</b><br><b>2 weeks</b><br>(n=12) | <b>Mini-PUF</b><br><b>2 weeks</b><br>(n=12) | <b>Mini-PUF</b><br><b>8h</b><br>(n=12) |
|-----------------------------------|--------------------------------------------|---------------------------------------------|----------------------------------------|
| <b>1-Methylnaphthalene</b>        | 2.1 $\pm$ 1.0                              | 0.9 $\pm$ 0.2                               | 1.2 $\pm$ 0.3                          |
| <b>2-Methylnaphthalene</b>        | 1.9 $\pm$ 0.5                              | 0.8 $\pm$ 0.2                               | 1.6 $\pm$ 0.2                          |
| <b>Biphenyl</b>                   | 2.0 $\pm$ 0.3                              | 0.7 $\pm$ 0.2                               | 2.3 $\pm$ 0.3                          |
| <b>2,3-Dimethylnaphthalene</b>    | 2.2 $\pm$ 1.1                              | 0.6 $\pm$ 0.1                               | 1.2 $\pm$ 0.2                          |
| <b>2,3,5-Trimethylnaphthalene</b> | 1.9 $\pm$ 0.6                              | 6.7 $\pm$ 8.6                               | 2.4 $\pm$ 0.2                          |
| <b>1-Methylfluorene</b>           | 1.4 $\pm$ 0.3                              | 1.6 $\pm$ 1.4                               | 3.0 $\pm$ 0.8                          |
| <b>2-Methylphenanthrene</b>       | 6.2 $\pm$ 2.0                              | 2.1 $\pm$ 0.8                               | 4.4 $\pm$ 0.6                          |
| <b>3-Methylphenanthrene</b>       | 6.0 $\pm$ 1.9                              | 2.0 $\pm$ 0.6                               | 4.4 $\pm$ 0.5                          |
| <b>1-Methylphenanthrene</b>       | 6.5 $\pm$ 2.2                              | 2.1 $\pm$ 0.7                               | 4.9 $\pm$ 0.9                          |
| <b>1-Methylantracene</b>          | 5.8 $\pm$ 2.0                              | 1.9 $\pm$ 0.6                               | 4.2 $\pm$ 0.5                          |
| <b>2-Phenylnaphthalene</b>        | 8.3 $\pm$ 3.1                              | 3.4 $\pm$ 2.4                               | 4.9 $\pm$ 0.4                          |
| <b>1-Methylfluoranthene</b>       | 12 $\pm$ 8.8                               | 1.9 $\pm$ 1.1                               | 3.5 $\pm$ 1.3                          |
| <b>1-Methylpyrene</b>             | 20 $\pm$ 13                                | 3.7 $\pm$ 1.9                               | 3.7 $\pm$ 1.3                          |
| <b>Retene</b>                     | 10 $\pm$ 4.0                               | 0.6 $\pm$ 0.9                               | 3.4 $\pm$ 0.6                          |
| <b>2-Methylchrysene</b>           | 6.2 $\pm$ 3.6                              | 1.2 $\pm$ 0.7                               | 1.4 $\pm$ 0.4                          |
| <b>Perylene</b>                   | 7.0 $\pm$ 7.2                              | 1.2 $\pm$ 0.7                               | 1.4 $\pm$ 0.2                          |

**Table SI-4.** Accuracy (expressed as %  $((C_{act}-C_{PAS})/C_{act})\times 100$ ) of R-values in estimating air concentrations.

| PUF:<br>Exposure time:  | <b>PUF-PAS</b><br><b>2 weeks</b><br>(n=6) | <b>Mini-PUF</b><br><b>2 weeks</b><br>(n=6) | <b>Mini-PUF</b><br><b>8h</b><br>(n=4) |
|-------------------------|-------------------------------------------|--------------------------------------------|---------------------------------------|
| <b>Nap</b>              | 30                                        | 107                                        | 2                                     |
| <b>Ace</b>              | -26                                       | 91                                         | 150                                   |
| <b>Acy</b>              | -73                                       | -18                                        | 22                                    |
| <b>Flu</b>              | 10                                        | -15                                        | -2                                    |
| <b>Phe</b>              | -7                                        | -26                                        | -23                                   |
| <b>Fla</b>              | 110                                       | 42                                         | -40                                   |
| <b>Pyr</b>              | 260                                       | 65                                         | -19                                   |
| <b>BaA</b>              | 240                                       | 54                                         | -37                                   |
| <b>Chr</b>              | 200                                       | 50                                         | -35                                   |
| <b>BbF</b>              | 340                                       | 180                                        | 41                                    |
| <b>BkF</b>              | 190                                       | 53                                         | 10                                    |
| <b>BaP</b>              | 150                                       | -3                                         | 6                                     |
| <b>Ind</b>              | 910                                       | 360                                        | 110                                   |
| <b>BgP</b>              | 100                                       | -32                                        | 33                                    |
| <b>PAH<sub>15</sub></b> | 36                                        | -31                                        | 9                                     |

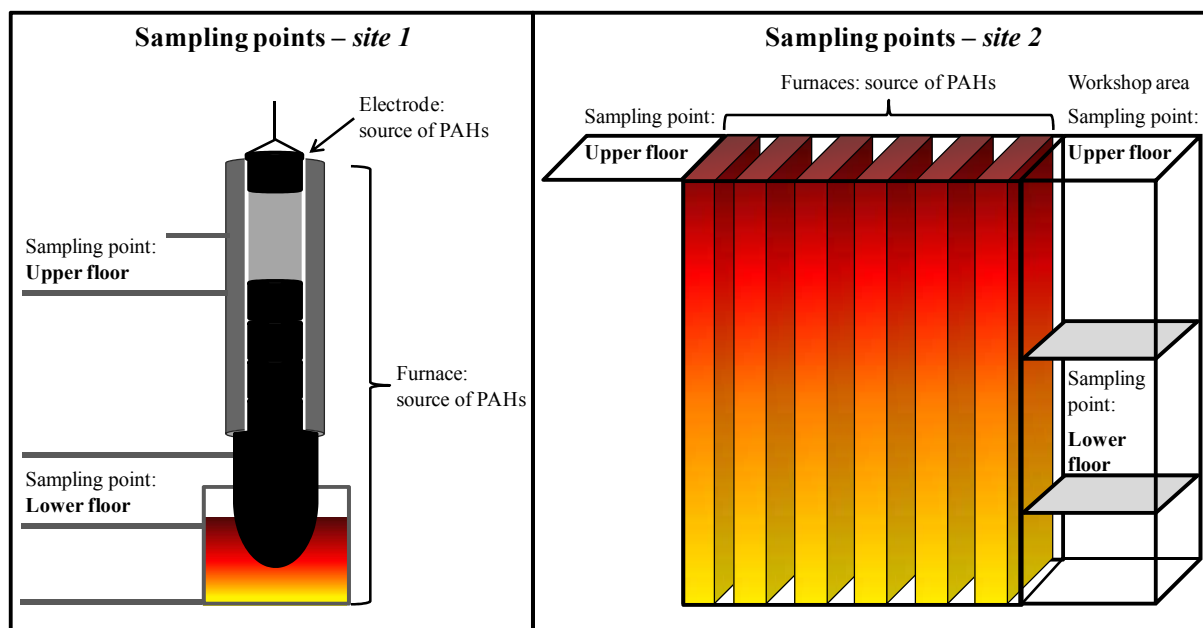

**Figure SI-1.** Schematic figure of the sampling points at each site. The sources of potential PAH emission are also indicated.

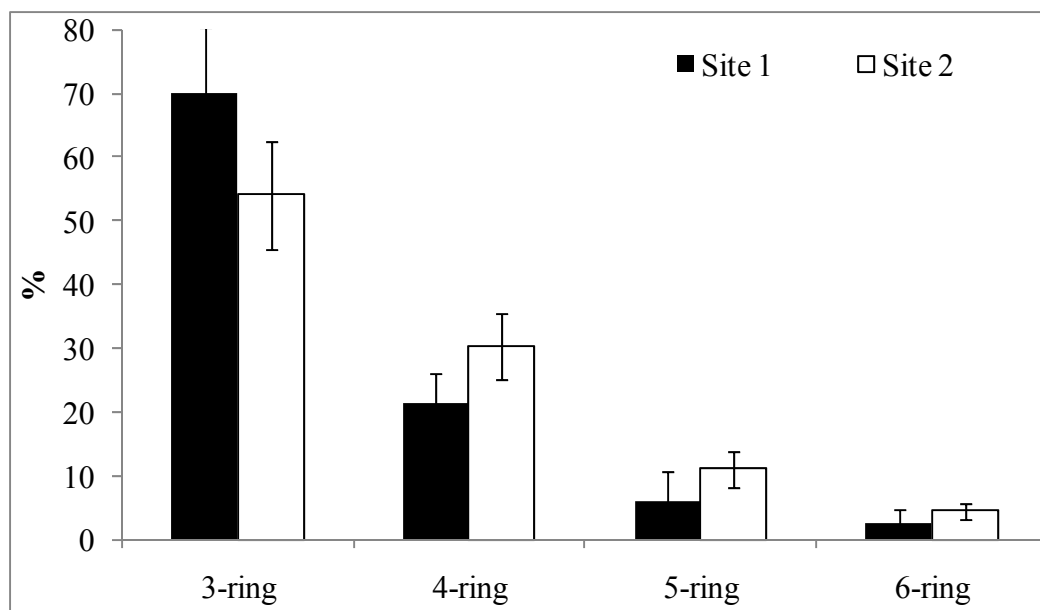

**Figure SI-2.** Average PAH pattern at the two sampling sites. The pattern is based on 12 samples at each site.



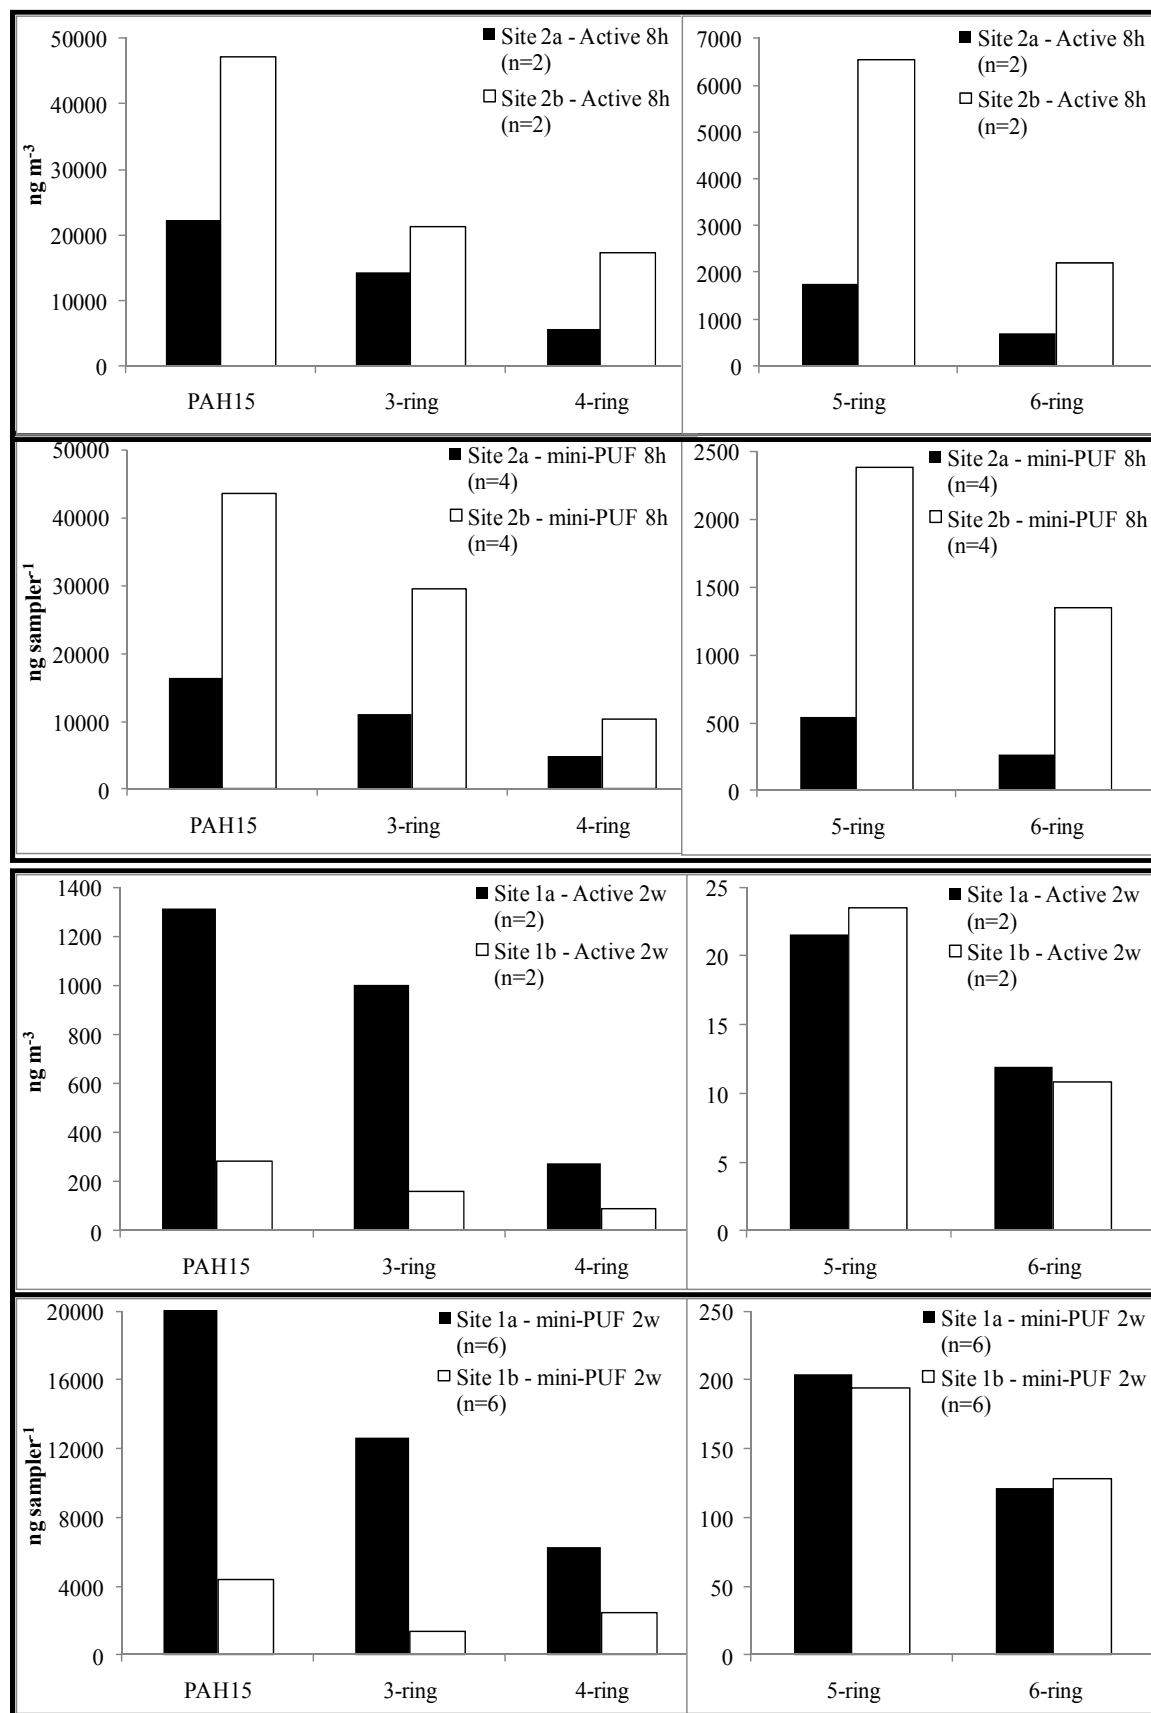

**Figure SI-3.** Spatial distribution of PAHs from active and passive samplers at two sampling points in each site.
